# Supplementary material for: Novel Theranostic Opportunities Offered by Characterization of Altered Membrane Lipid Metabolism in Breast Cancer Progression
Source: Oxford University Press journal article supplement (doi:10.1158/0008-5472.can-10-3894), 2011-03-17
Supplement: 00085472can103894-sup-stab_3.xls [file 00085472can103894-sup-stab_3.xls]

## Sheet: Taul1
Supplementary Table S3. Lipids, their retention times and m/z values that were obtained both in the ESI- and ESI+ ion modes. The mean and median values have been shown for each lipid both in the training and validation series. The unit for the lipid concentrations is μmol / (mg protein/mg tissue).
ESI+ ION MODE			TRAINING SERIES		VALIDATION SERIES			ESI- ION MODE			TRAINING SERIES		VALIDATION SERIES
Lipid	m/z	RT(s)	Mean	Median	Mean	Median		Lipid	m/z	RT(s)	Mean	Median	Mean	Median
Cer(d18:1/17:0)	552.534	388	0.000612749	0.000432762	0.000386476	0.000358821		Cer(d18:1/16:0)	536.505	376	0.000539705	0.000344	0.000491719	0.000423
Cer(d18:1/24:1)	630.617	411	0.00074904	0.000490295	0.000799562	0.000656218		Cer(d18:1/17:0)	596.526	384	0.00406605	0.00326	0.00228536	0.002215
PC(16:0/0:0)	496.341	196	0.000546795	0.000413492	0.000356908	0.000345578		GlcCer(d18:0/24:0(2-OH))	872.681	398	0.000292272	0.000155	0.000204319	0.0001315
PC(17:0/17:0)	762.659	405	0.00163289	0.000573859	0.000944664	0.00054437		GlcCer(d18:0/24:0(2-OH))	826.679	398	0.00041681	0.000225	0.00046259	0.0002545
PC(30:0)	706.55	362	0.000732544	0.000509779	0.000569926	0.000504131		GlcCer(t18:0/24:0)	828.689	407	0.000362101	0.000208	0.000410964	0.000245
PC(31:2)+PE(34:2)	716.538	373	0.00112732	0.000775892	0.00114236	0.000926721		GlcCer(t18:0/24:0)	874.696	408	0.000237198	0.000135	0.000196013	0.000114
PC(32:0)	734.569	378	0.00449882	0.00350582	0.00305486	0.00284315		PC(14:0/16:0)	750.536	362	0.000851121	0.000564	0.000673667	0.0006395
PC(32:1)	732.553	364	0.00261544	0.00168544	0.00241155	0.00200033		PC(16:0/16:0)	778.561	378	0.00344342	0.00271	0.00295155	0.00287
PC(32:1e)+PE(35:1e)	718.561	384	0.00344461	0.00253307	0.00372955	0.00316975		PC(16:0/16:0)	778.574	393	0.000642106	0.000546	0.000539893	0.0005225
PC(32:2)	730.538	352	0.000276919	0.000177381	0.000258337	0.000203975		PC(16:0/16:1)	688.498	363	0.000267871	0.000166	0.000496565	0.0004145
PC(33:0)	748.591	386	0.00329574	0.00136753	0.00332775	0.00203619		PC(16:0/18:1)	804.575	378	0.0177202	0.014	0.0146774	0.01325
PC(33:2)+PE(36:2)	744.565	383	0.00649212	0.00517276	0.00652986	0.00603633		PC(16:0/20:4)	826.562	355	0.000311105	0.000198	0.00150147	0.00149
PC(33:4)	740.555	374	0.000903388	0.000548664	0.000764755	0.000569482		PC(16:0/20:4)	826.561	361	0.00287154	0.00222	0.00245619	0.002185
PC(34:1)	760.585	378	0.0192938	0.0159626	0.0144731	0.0130314		PC(18:0/20:3)	856.609	382	0.00124943	0.000929	0.000937036	0.000831
PC(34:1e)+PE(37:1e)	746.568	379	0.00483987	0.00333684	0.00528434	0.00481213		PC(18:0/20:4)	854.593	376	0.0031066	0.00255	0.00263607	0.002475
PC(34:1e)+PE(37:1e)	746.576	392	0.0044578	0.00359828	0.00469224	0.00439984		PC(18:0/22:5)	880.608	375	0.000286847	0.00024	0.000259681	0.0002365
PC(34:2)	758.569	365	0.00814853	0.0065474	0.00646013	0.00573753		PC(18:0/22:6)	850.562	355	0.000371171	0.000285	0.000332967	0.000298
PC(34:2)	758.223	394	0.000298446	0.000153339	9.39733e-05	4.56957e-05		PC(18:0/22:6)	790.538	372	0.00139185	0.00101	0.00117943	0.00105
PC(34:3)	756.553	370	0.000474753	0.000366977	0.000297508	0.000267539		PC(18:1/18:0)	832.608	392	0.00499569	0.00418	0.00479143	0.004445
PC(34:3e)+PE(37:3e)	742.546	379	0.00261922	0.00192867	0.00270925	0.00218457		PC(18:1/20:1)	858.625	391	0.000558733	0.00037	0.00157367	0.0007905
PC(34:4)+PE(37:4)	754.533	365	0.000355181	0.000257327	0.00032326	0.000268779		PC(18:1/20:4)	852.578	361	0.00104302	0.000819	0.000910369	0.000889
PC(34:4e)	740.605	377	0.00620135	0.00460046	0.00408332	0.00349779		PC(32:1)	776.546	363	0.00224322	0.00163	0.00216337	0.001785
PC(35:1)	774.635	403	0.00182087	0.00124827	0.0019406	0.00149954		PC(32:1)	776.565	383	0.00066227	0.000584	0.000593964	0.000537
PC(35:1)	774.599	385	0.00397489	0.00247869	0.00460211	0.00394326		PC(34:2)	802.56	365	0.00625784	0.00495	0.00530607	0.00462
PC(35:2)	772.582	374	0.00197032	0.00132211	0.00232709	0.00205047		PC(36:2)	830.592	380	0.00569947	0.00459	0.0050444	0.004655
PC(36:1)	788.677	406	0.000256116	0.000192855	0.000242225	0.000212523		PC(36:3)	828.576	367	0.00236751	0.00201	0.00202	0.001845
PC(36:1)	788.617	391	0.00547818	0.00458831	0.00497691	0.0045333		PC(O-16:0/18:2)	788.582	375	0.000283942	0.000156	0.000320365	0.000203
PC(36:2)	786.601	380	0.00793849	0.00628488	0.00606464	0.00572994		PC(P-16:0/18:1)/PC(O-16:1/18:1)	728.56	400	0.00099822	0.000754	0.000841464	0.0007395
PC(36:3)	784.584	368	0.00294095	0.00234635	0.00242812	0.00221795		PC(P-18:0/20:4)/PC(O-18:2/20:4)	838.598	370	0.000340193	0.000288	0.0002965	0.00027
PC(36:4)	782.568	361	0.00344746	0.002608	0.00276669	0.0025748		PE(18:0/18:1)	744.556	395	0.00372178	0.00292	0.0032356	0.00309
PC(36:4)	782.566	377	0.00198658	0.00134097	0.00104512	0.000883889		PE(18:0/20:3)	768.548	386	0.00127513	0.000961	0.00119817	0.0009925
PC(36:4)	804.551	361	0.000494222	0.000382977	0.000344614	0.000309563		PE(18:0/20:4)	766.538	361	0.000547954	0.000411	0.00072694	0.000662
PC(36:5)	780.551	365	0.00104136	0.000863359	0.00075329	0.00061645		PE(18:0/20:4)	766.539	380	0.00380808	0.00324	0.00349714	0.00337
PC(36:5)	780.553	359	0.000760485	0.000542063	0.000589622	0.000382238		PE(18:0/22:4)	794.564	388	0.000816913	0.000701	0.000762512	0.0007035
PC(36:5e)+PE(38:5e)	766.566	367	0.00470556	0.00339651	0.00490056	0.00481687		PE(18:1/18:0)	744.554	378	0.00258206	0.00191	0.0036344	0.00332
PC(37:1)	802.637	404	8.38216e-05	4.81674e-05	6.60429e-05	4.66777e-05		PE(34:1)	716.525	382	0.00179909	0.00142	0.00190531	0.001675
PC(37:2)	800.614	389	0.000839861	0.000507245	0.000812903	0.000622356		PE(36:2)	742.539	365	0.00103068	0.000782	0.00153805	0.001325
PC(37:4)+PE(40:4)	796.604	390	0.00195295	0.00146434	0.00196213	0.00191469		PE(36:2)	742.539	383	0.00407767	0.00321	0.00424267	0.003725
PC(37:4)+PE(40:4)	796.57	378	0.00148276	0.00107225	0.001629	0.00162678		PE(36:3)	740.523	369	0.0016303	0.000942	0.00154326	0.00114
PC(38:1)	816.652	410	0.000102314	7.11707e-05	9.45634e-05	7.99446e-05		PE(36:4)	738.51	364	0.000636167	0.000506	0.00061541	0.0005565
PC(38:2)	814.634	394	0.000561302	0.000343634	0.000409312	0.000330917		PE(P-16.0/16:1)/PE(O-16:1/16:1)	672.498	373	0.000170933	8.12e-05	0.00020952	0.0001345
PC(38:2)	814.691	408	0.00403951	0.00305134	0.00541176	0.00471328		PE(P-16:0/18:1)	700.529	387	0.00309337	0.00232	0.0030337	0.00295
PC(38:3)	812.677	400	0.000175033	0.000135423	0.000154879	0.000134843		PE(P-16:0/18:2)	698.514	375	0.000865752	0.00051	0.00100286	0.000763
PC(38:3)	812.616	384	0.00147869	0.00103419	0.00109821	0.000927803		PE(P-16:0/18:2)/PE(O-16:1/18:2)	698.556	364	0.000450567	0.000268	0.000502413	0.0003495
PC(38:4)	810.6	382	0.00252268	0.00170411	0.00181426	0.00167981		PE(P-16:0/20:4)	722.513	371	0.00479172	0.00351	0.00385071	0.00358
PC(38:4)	810.601	376	0.00367767	0.00283477	0.00282622	0.00278942		PE(P-36:2)	726.545	388	0.00106008	0.000822	0.00110269	0.0009115
PC(38:5)	808.583	379	0.000920179	0.00077093	0.000522979	0.000462725		PE(P-38:4)	750.545	384	0.00364301	0.00238	0.00267551	0.00245
PC(38:5)	808.585	369	0.00132889	0.00106242	0.00106717	0.00100995		PI(18:0/20:3)	887.566	371	0.000539509	0.000431	0.000518702	0.000454
PC(38:5)	830.571	367	0.000190216	0.000158736	0.000143733	0.000135748		PI(18:0/20:4)	885.551	365	0.00131429	0.00105	0.00127267	0.001175
PC(38:5e)	794.598	373	0.000429072	0.000329854	0.000326861	0.000308012		SM(d18:1/16:0)	747.559	359	0.00469509	0.00409	0.00383452	0.00351
PC(38:6)	806.57	357	0.000415135	0.000340954	0.000342906	0.000314166		SM(d18:1/16:0)	687.545	359	0.00152197	0.00121	0.0020755	0.001895
PC(38:6)	806.568	364	0.000428576	0.000355033	0.000320667	0.000306976		SM(d18:1/20:0)	803.63	393	0.000330621	0.00026	0.000280113	0.000244
PC(40:4)	838.633	392	0.00023651	0.000178002	0.000207305	0.000178978		SM(d18:1/22:0)	831.661	406	0.000862585	0.000729	0.000759429	0.000719
PC(40:5)	836.617	378	0.000287985	0.000221147	0.000246353	0.000222748		SM(d18:1/24:0)	859.692	419	0.000824783	0.000665	0.000787083	0.0007195
PC(40:6)	834.602	373	0.000288888	0.000220639	0.000226212	0.000199003		SM(d18:1/24:1)	857.677	404	0.00224401	0.00189	0.00188879	0.001735
PC(40:7)	832.586	376	0.000484091	0.000360126	0.000362524	0.000347012		SM(d18:1/24:1)	857.679	409	0.000922864	0.000758	0.000733964	0.0006225
PE(17:0/17:0)	720.555	390	0.0082407	0.00628715	0.00725625	0.00721285		SM(d18:1/24:2)	855.66	392	0.000363221	0.000306	0.00033481	0.0002885
PE(38:3)+PC(35:3)	770.578	383	0.00177567	0.00134162	0.0021334	0.00152473		unidentified	255.233	266	0.00511208	0.00405	0.00299333	0.002845
PE(38:4)	768.578	373	0.00478278	0.00367195	0.00465903	0.0043081		unidentified	281.249	271	0.00156786	0.00102	0.00143776	0.00109
PE(38:4)	768.556	378	0.00594876	0.00474458	0.00463579	0.00421558		unidentified	283.265	300	0.00462213	0.00354	0.0026206	0.00244
PE(40:6)+PC(37:6)	792.587	369	0.00120311	0.000899852	0.00122053	0.00104765		unidentified	303.233	240	0.00103002	0.000653	0.000817583	0.0006015
PE(P-16:0/18:1)	702.545	384	0.00244047	0.00190997	0.00247265	0.00219657		unidentified	383.19	300	0.00140809	0.00102	0.000602048	0.000542
PE(P-16:0/20:4)	724.525	369	0.000534719	0.000451521	0.000328787	0.000309936		unidentified	398.233	254	5.4663e-05	4.06e-05	0.00103945	9.405e-05
PE(P-16:0/22:6)	748.528	365	0.00164025	0.00110859	0.00135305	0.00105653		unidentified	409.311	311	5.72589e-05	4.47e-05	0.00188835	9.895e-05
PE(P-18:0/22:5)	778.553	375	0.000583204	0.000434245	0.000512033	0.000411747		unidentified	465.305	279	0.00101791	0.000406	0.000568775	0.0003305
PE(P-36:2)	728.56	382	0.000975537	0.000735051	0.00101157	0.000874421		unidentified	582.511	376	0.000332233	0.000222	0.000192644	0.000167
PE(P-38:4)	752.554	382	0.00281842	0.00211036	0.00238559	0.00232991		unidentified	586.497	384	0.00234658	0.00176	0.000719976	0.000646
PE(P-38:5)	750.408	396	0.000130301	9.29793e-05	6.28942e-05	5.38988e-05		unidentified	646.615	411	0.000290695	0.000203	0.000282914	0.0002395
PE(P-38:5)	750.541	370	0.00186503	0.00138013	0.00159868	0.00145301		unidentified	682.593	411	0.000337645	0.000238	0.000132388	0.000118
SM(d18:1/14:0)	675.543	339	9.84742e-05	7.97825e-05	5.82646e-05	4.78915e-05		unidentified	692.62	411	0.000437574	0.00032	0.0003008	0.0002505
SM(d18:1/15:0)	689.558	350	0.00021592	0.000164166	0.000157491	0.000128889		unidentified	714.509	368	0.000856524	0.000594	0.000961048	0.000724
SM(d18:1/16:0)	703.574	359	0.00350685	0.00301844	0.00268452	0.00242482		unidentified	714.547	362	0.000464424	0.000205	0.000541411	0.0004135
SM(d18:1/16:0)	725.556	359	0.000834493	0.000698333	0.000739938	0.000673524		unidentified	719.535	338	0.000216578	0.00017	0.000186074	0.000159
SM(d18:1/18:0)	731.609	379	0.000337138	0.00026787	0.000240124	0.000223683		unidentified	730.551	388	0.000300298	0.000198	0.000507483	0.000392
SM(d18:1/22:0)	787.669	407	0.000362879	0.00030514	0.00036115	0.000333203		unidentified	736.53	376	0.000418774	0.000284	0.00036281	0.0003285
SM(d18:1/23:0)	801.689	435	0.000647582	0.000434319	0.00059431	0.000461774		unidentified	748.53	371	0.00200738	0.00168	0.0018598	0.00176
SM(d18:1/24:1)	813.686	407	0.00106871	0.000876448	0.00105335	0.000971312		unidentified	762.514	358	0.000393946	0.000324	0.000348952	0.0003325
SM(d18:1/24:2)	811.641	391	0.000704155	0.00051376	0.000581475	0.000495786		unidentified	762.563	373	0.000251384	0.000148	0.000240813	0.0001945
TG(14:0/16:0/18:0)	824.772	496	0.0175717	0.00901041	0.01009	0.00463898		unidentified	762.564	383	0.000301913	0.000236	0.00027426	0.000253
TG(14:0/16:0/18:1)	822.756	470	0.0656842	0.034683	0.0346519	0.0192594		unidentified	764.529	366	0.000985512	0.000767	0.000879095	0.000803
TG(16:0/16:0/18:0)	852.804	520	0.010096	0.00401734	0.00662319	0.00244903		unidentified	764.577	386	0.000493336	0.000353	0.000402774	0.000371
TG(16:0/16:1/18:1)	848.542	366	0.00100807	0.000742749	0.00109956	0.00093702		unidentified	768.555	367	0.000371934	0.000298	0.000526214	0.0004895
TG(16:0/18:0/18:0)	880.834	543	0.00583144	0.00182705	0.00352269	0.00131747		unidentified	770.571	380	0.000705366	0.00053	0.00104576	0.0009855
TG(16:0/18:0/18:1)	878.82	518	0.068418	0.0331325	0.0396776	0.0179719		unidentified	770.572	394	0.000395677	0.000277	0.000837769	0.000607
TG(16:0/18:1/16:0)	850.787	492	0.119776	0.0682373	0.0671172	0.0359367		unidentified	772.528	365	0.0002982	0.000204	0.000289227	0.000237
TG(16:0/18:1/18:1)	876.803	488	0.358772	0.221479	0.165662	0.100834		unidentified	773.54	360	0.00028808	0.000234	0.000241343	0.000208
TG(16:0/18:1/18:1)	876.805	367	0.000532797	0.000114489	4.06728e-05	1.82691e-05		unidentified	774.55	378	0.000571001	0.000426	0.0004777	0.0003915
TG(16:0/18:2/18:1)	874.788	466	0.265596	0.15577	0.125173	0.0742006		unidentified	775.586	378	0.000566307	0.00049	0.000463536	0.00044
TG(17:0/18:1/16:0)	864.805	502	0.00604465	0.00215817	0.00467492	0.00138089		unidentified	776.501	396	0.000242632	0.000192	0.00013006	0.0001115
TG(17:0/18:1/18:1)	890.822	498	0.0124346	0.00436195	0.00767132	0.00265515		unidentified	786.528	395	0.00083418	0.00067	0.0008335	0.00081
TG(17:1/18:1/18:2)	886.79	456	0.0031373	0.00133444	0.00224854	0.000846306		unidentified	786.582	376	0.000448716	0.000324	0.000348983	0.0003175
TG(18:1/18:1/18:1)	902.82	485	0.195306	0.114017	0.101883	0.0620115		unidentified	788.53	358	0.000368088	0.000263	0.00030423	0.000258
TG(18:1/18:1/20:1)	930.854	508	0.0255006	0.0104214	0.0150555	0.00717404		unidentified	788.586	384	0.000371754	0.000259	0.000345901	0.0002745
TG(18:1/18:2/18:1)	900.804	463	0.128377	0.0706342	0.0673806	0.0330543		unidentified	790.597	386	0.000710396	0.000513	0.000661762	0.000543
TG(38:0)	684.617	415	0.00023766	0.000149567	0.000132008	0.00010086		unidentified	792.546	365	0.000258242	0.000207	0.000277036	0.0002645
TG(38:1)	682.599	397	8.6116e-05	4.15533e-05	7.06878e-05	3.77346e-05		unidentified	792.566	382	0.000685106	0.000454	0.000572536	0.000462
TG(40:0)	712.647	426	0.000524701	0.000260036	0.000287983	0.000137995		unidentified	794.561	377	0.000595177	0.000467	0.000654298	0.0006115
TG(40:1)	710.631	412	0.000303245	0.000156884	0.000178765	6.60147e-05		unidentified	796.57	392	0.000310437	0.00023	0.000239068	0.0002115
TG(42:0)	740.676	437	0.00165388	0.0006622	0.00092892	0.00036637		unidentified	797.654	404	0.000359365	0.000288	0.000490238	0.0004675
TG(42:1)	738.661	421	0.00110807	0.000429197	0.000643211	0.000223522		unidentified	798.641	403	0.000350106	0.000263	0.000428786	0.00039
TG(43:0)	754.693	442	0.000256605	0.000141294	0.000176742	0.000112308		unidentified	800.661	399	0.000280232	0.000135	0.00030368	0.000187
TG(44:0)	768.708	453	0.0041711	0.00160946	0.00223145	0.000940989		unidentified	810.527	383	0.000404854	0.000349	0.000451762	0.0003725
TG(44:1)	766.692	435	0.00517613	0.00200988	0.00287071	0.00109069		unidentified	810.563	367	0.000459332	0.000361	0.000452083	0.000399
TG(44:2)	764.677	416	0.00177585	0.000793728	0.00110922	0.000398299		unidentified	810.682	413	0.000216609	0.000133	0.000330331	0.000252
TG(45:0)	782.725	461	0.000624747	0.000334975	0.00042997	0.000245387		unidentified	812.544	395	0.000319399	0.00028	0.00032775	0.000322
TG(45:1)	780.71	442	0.00058873	0.000241785	0.000467214	0.000218461		unidentified	812.583	370	0.000381321	0.000301	0.000321312	0.000308
TG(45:2)	778.695	429	0.000221178	0.000108699	0.000178379	9.86865e-05		unidentified	815.555	359	0.000395172	0.000334	0.000298024	0.000262
TG(46:0)	796.74	473	0.0117382	0.00525103	0.00663138	0.00292457		unidentified	816.558	372	0.000424566	0.000356	0.000448619	0.0003925
TG(46:1)	794.724	451	0.0192389	0.00961481	0.00972701	0.00454818		unidentified	822.581	391	0.00024317	0.000193	0.000147752	0.000136
TG(46:2)	792.709	433	0.00900918	0.0039988	0.00515601	0.00221765		unidentified	834.53	380	0.000291214	0.000239	0.00029956	0.000278
TG(46:3)	790.693	419	0.00314883	0.00112792	0.00298666	0.00104853		unidentified	835.535	366	0.000259456	0.000185	0.000311292	0.000238
TG(47:0)	810.757	482	0.00134609	0.000652866	0.00083724	0.000451547		unidentified	842.671	395	0.000341935	0.00011	0.000234945	0.0001325
TG(47:1)	808.741	460	0.00282635	0.00109386	0.00195073	0.000885782		unidentified	844.6	383	0.000202293	0.000154	0.000313006	0.0002485
TG(47:2)	806.726	442	0.0010099	0.000369192	0.000764356	0.000333083		unidentified	845.677	412	0.00032218	0.00026	0.000306951	0.000275
TG(47:3)	804.71	423	0.000192794	0.000106738	0.000275823	0.000198151		unidentified	846.672	413	0.000319409	0.000244	0.000261833	0.0002445
TG(48:2)	820.74	450	0.0401266	0.0207218	0.0208984	0.0104573		unidentified	852.587	377	0.000198675	0.000147	0.000121773	0.0001035
TG(48:3)	818.725	434	0.011695	0.00495589	0.00687865	0.00272833		unidentified	861.551	368	0.000315543	0.00025	0.000351076	0.000299
TG(48:4)	816.708	421	0.00186979	0.000991623	0.00136568	0.000771523		unidentified	862.653	399	0.00025676	0.000142	0.000111092	9.28e-05
TG(49:0)	838.788	498	0.00121418	0.000527204	0.000933929	0.000375897		unidentified	863.566	382	0.000336946	0.000266	0.000374895	0.000293
TG(49:1)	836.773	480	0.00856776	0.0031555	0.00585277	0.00214602		unidentified	872.565	378	0.000487299	0.000416	0.000380452	0.0003605
TG(49:2)	834.755	464	0.00538189	0.00216863	0.00374335	0.00146932		unidentified	874.581	392	0.000247497	0.000191	0.000190325	0.0001555
TG(49:3)	832.74	468	0.00207447	0.00142048	0.00121007	0.000817956		unidentified	878.594	370	0.000239807	0.000187	0.000202575	0.0001815
TG(49:4)	830.724	440	0.000267093	0.00016977	0.000375948	0.000201202		unidentified	900.596	392	0.000257991	0.000219	0.000216971	0.0002005
TG(50:2)	848.772	467	0.143487	0.0817073	0.0672781	0.0375315		unidentified	903.769	488	0.000195194	6.87e-05	0.000144209	4.295e-05
TG(50:3)	846.756	449	0.0530811	0.0279199	0.0277274	0.0138953		unidentified	927.768	464	0.000100557	3.64e-05	6.90133e-05	2.835e-05
TG(50:4)	844.74	435	0.00866604	0.00330234	0.00544706	0.00208865		unidentified	929.784	486	0.000141238	5.16e-05	9.74833e-05	3.315e-05
TG(50:5)	842.725	441	0.00108942	0.000536973	0.000642273	0.000311299
TG(51:2)	862.789	477	0.0181304	0.00694798	0.0112104	0.0046033
TG(51:3)	860.773	457	0.00802905	0.00297688	0.00537471	0.00187251
TG(51:4)	858.758	452	0.00119798	0.000523153	0.000916981	0.000426192
TG(52:4)	872.772	448	0.0690776	0.0366474	0.0379964	0.0174285
TG(52:5)	870.755	436	0.0104376	0.00373062	0.00620389	0.00253291
TG(52:6)	868.741	450	0.00138185	0.000707719	0.000749922	0.000409485
TG(52:7)	866.726	444	0.000499097	0.000319401	0.000255308	0.000183108
TG(53:3)	888.806	476	0.0100454	0.00445522	0.0066821	0.00270501
TG(53:5)	884.775	460	0.000692384	0.000368726	0.000550725	0.000308911
TG(54:1)	906.852	547	0.0130237	0.0051057	0.00971579	0.00265069
TG(54:2)	904.836	514	0.115902	0.0646526	0.0682482	0.03455
TG(54:5)	898.789	455	0.0207869	0.00815709	0.0152542	0.00580108
TG(54:5)	898.787	447	0.0398658	0.0192764	0.0226694	0.00957157
TG(54:6)	896.771	437	0.00941438	0.0034676	0.00633058	0.00231179
TG(54:7)	894.755	440	0.00186898	0.000655959	0.00110277	0.000470023
TG(54:8)	892.748	420	0.000288345	0.000169752	0.000460495	0.000320687
TG(55:2)	918.85	509	0.00249834	0.00153462	0.00126947	0.000740698
TG(55:3)	916.836	486	0.00326349	0.00212455	0.00186424	0.000987776
TG(55:4)	914.82	465	0.00152927	0.000870761	0.000876378	0.000458754
TG(55:5)	912.807	474	0.000518642	0.000286739	0.000344169	0.000198496
TG(56:2)	932.869	542	0.00955964	0.00266289	0.00578363	0.00182168
TG(56:4)	928.836	481	0.0162374	0.00786512	0.00990254	0.00482257
TG(56:5)	926.819	471	0.00912448	0.005179	0.00526214	0.00300479
TG(56:6)	924.804	454	0.0226998	0.00929048	0.0126698	0.00684948
TG(56:7)	922.787	441	0.00766047	0.00269545	0.00547223	0.00232885
TG(56:8)	920.774	431	0.00329696	0.0010073	0.00191477	0.00110672
TG(56:9)	918.764	426	0.00030176	0.000153148	0.000187199	0.000119907
TG(57:5)	940.837	457	0.000795582	0.000465637	0.000277953	0.000173113
TG(57:6)	938.824	451	0.000473902	0.000239917	0.000287679	0.000150592
TG(58:10)	944.775	426	0.000301805	0.000167021	0.000185316	0.000109655
TG(58:2)	960.901	573	0.000623029	0.000287444	0.000551221	0.000237964
TG(58:3)	958.886	538	0.00218001	0.000957934	0.00176089	0.000715015
TG(58:4)	956.87	504	0.00148449	0.000672942	0.00103026	0.000433606
TG(58:5)	954.854	484	0.0011931	0.000644042	0.000587693	0.000373733
TG(58:5)	954.855	489	0.00109785	0.000610768	0.000570488	0.000373733
TG(58:6)	952.837	469	0.00319964	0.0017585	0.00157555	0.00110152
TG(58:7)	950.82	452	0.00424686	0.00197039	0.0024077	0.0015226
TG(58:8)	948.806	443	0.00294748	0.00125028	0.00163662	0.000906521
TG(58:9)	946.79	433	0.00140388	0.000527614	0.000969173	0.000506953
TG(59:1)	976.841	454	0.000465425	0.000251025	0.00026042	0.000173844
TG(59:2)	974.823	441	0.0004783	0.000234808	0.000326047	0.000165166
TG(60:10)	972.805	431	0.000356715	0.000187865	0.000236974	0.00014262
TG(60:2)	988.933	626	0.00015212	9.85009e-05	0.00014337	6.65413e-05
TG(60:3)	986.919	575	0.000330361	0.000170141	0.000330978	0.000152054
TG(60:4)	984.904	533	0.000275677	0.000148491	0.000253674	0.000120606
TG(60:7)	978.855	467	0.000356531	0.000214088	0.000193116	0.000150838
unidentified	369.352	459	0.000468093	0.0002107	0.000404562	0.000262924
unidentified	369.352	450	0.000472875	0.0002107	0.000385041	0.000255982
unidentified	393.299	290	0.00165013	0.00076375	0.000912109	0.00066003
unidentified	413.267	288	0.00258881	0.00179008	0.00156542	0.00145204
unidentified	439.378	419	0.000171007	9.09209e-05	0.000190681	9.35025e-05
unidentified	465.392	423	0.000184772	0.000102002	0.000194087	6.92059e-05
unidentified	467.409	433	0.000431339	0.000200386	0.000541952	0.000239603
unidentified	491.409	416	0.000121545	6.39875e-05	0.000166034	5.75877e-05
unidentified	493.425	433	0.000500661	0.000229353	0.000653559	0.000258244
unidentified	495.441	451	0.000936127	0.000454822	0.00111793	0.000537557
unidentified	499.358	196	0.0113492	0.00825725	0.00755595	0.00724146
unidentified	509.46	459	0.000227837	0.000131193	0.000255749	0.000151703
unidentified	516.514	384	0.000149198	0.000112137	0.000129868	0.000125185
unidentified	519.441	432	0.000508572	0.000226932	0.000685603	0.000328317
unidentified	521.457	449	0.00192772	0.000995717	0.00221101	0.00119525
unidentified	521.457	444	0.00178828	0.000920598	0.00169526	0.00100079
unidentified	523.472	470	0.00288746	0.00150246	0.00348452	0.00170187
unidentified	523.473	477	0.00243146	0.0012481	0.00176862	0.00106237
unidentified	524.371	236	0.000372814	0.000266007	0.00024976	0.000226654
unidentified	532.338	217	0.00108099	0.000754131	0.0018831	0.00175948
unidentified	537.494	479	0.000572423	0.000258974	0.000696593	0.000339759
unidentified	537.517	487	0.000526413	0.000218534	0.00041337	0.000289511
unidentified	545.456	430	0.000184957	9.41677e-05	0.000253631	0.00010621
unidentified	547.472	449	0.00162793	0.000826296	0.0020271	0.00109371
unidentified	547.472	443	0.00127398	0.00066854	0.00119309	0.000912737
unidentified	549.487	457	0.00270992	0.00145201	0.00271212	0.00170326
unidentified	549.488	469	0.0052643	0.00277676	0.00661003	0.00358249
unidentified	549.488	463	0.00452357	0.00235106	0.00525806	0.00275563
unidentified	549.489	475	0.00441184	0.00202435	0.00274945	0.00136244
unidentified	551.504	484	0.00336489	0.00182964	0.0040606	0.00197919
unidentified	551.504	493	0.00376822	0.00198777	0.00470273	0.00245618
unidentified	551.505	503	0.00301419	0.00148364	0.00218533	0.00130609
unidentified	553.51	496	0.0017064	0.00127185	0.00239611	0.00211877
unidentified	561.494	444	0.00029112	0.000185056	0.000380353	0.000170667
unidentified	563.508	466	0.000774943	0.000410329	0.000808983	0.000449844
unidentified	563.509	477	0.00092642	0.000456437	0.00132204	0.000595392
unidentified	563.517	482	0.000842875	0.000460113	0.000810303	0.000417497
unidentified	563.534	493	0.000725025	0.000356879	0.000601892	0.000430866
unidentified	573.488	448	0.00114701	0.000586044	0.00144486	0.000776463
unidentified	574.517	384	0.000920911	0.000732735	0.000556569	0.000495339
unidentified	575.503	466	0.00620789	0.00336757	0.0085329	0.00451294
unidentified	575.504	472	0.00544642	0.00270197	0.00486159	0.00171062
unidentified	575.505	445	0.00478591	0.00241324	0.00469469	0.00198664
unidentified	577.519	403	0.000222497	0.000145724	0.00029617	0.00025379
unidentified	577.519	489	0.0153899	0.00803636	0.0181108	0.011586
unidentified	577.52	509	0.00440711	0.00230917	0.00380103	0.00255907
unidentified	579.534	524	0.00195502	0.00129212	0.00232791	0.00177265
unidentified	579.534	529	0.00182601	0.000991857	0.00196534	0.0017244
unidentified	579.535	395	0.000768171	0.000557509	0.0011421	0.00104197
unidentified	583.508	370	8.30669e-05	6.8466e-05	9.17535e-05	8.67334e-05
unidentified	587.507	440	0.000142387	9.44978e-05	0.000167353	7.02886e-05
unidentified	589.523	460	0.000476594	0.000245036	0.000625412	0.000305564
unidentified	589.523	475	0.000469585	0.00024306	0.000676593	0.000319096
unidentified	589.551	489	0.000392102	0.000214794	0.000440627	0.000241894
unidentified	591.539	499	0.000529515	0.00026856	0.000866635	0.000328936
unidentified	591.564	510	0.000438475	0.000255518	0.000465246	0.000260028
unidentified	597.486	429	0.000149254	8.71642e-05	0.000185743	7.57855e-05
unidentified	599.503	448	0.00097262	0.000531626	0.00145525	0.00066322
unidentified	599.503	438	0.000983948	0.000531889	0.00100817	0.000609749
unidentified	601.519	465	0.0049319	0.0029215	0.00630896	0.00375279
unidentified	601.519	456	0.00401951	0.00197989	0.00408611	0.00191009
unidentified	601.519	381	9.78093e-05	6.41413e-05	0.000162091	0.000110212
unidentified	601.519	472	0.00388271	0.00163221	0.00200929	0.00105013
unidentified	603.534	396	0.000281909	0.000209901	0.000460209	0.000394779
unidentified	603.534	486	0.0108057	0.00562176	0.0144738	0.00932928
unidentified	603.535	505	0.00346578	0.00198446	0.00393999	0.00217524
unidentified	605.549	406	0.000224983	0.00017293	0.000395604	0.000375968
unidentified	605.55	511	0.00338147	0.00186565	0.00505319	0.00232982
unidentified	605.55	524	0.0026795	0.000982579	0.00210815	0.00132986
unidentified	607.389	375	0.000116436	8.75518e-05	0.000174546	0.000170871
unidentified	615.497	388	0.000123862	8.46767e-05	9.23041e-05	6.83656e-05
unidentified	617.513	398	0.000135561	9.66291e-05	0.000153724	0.000121011
unidentified	617.552	490	0.000135414	7.92763e-05	0.000199407	0.000104317
unidentified	625.519	456	0.000241949	0.000150224	0.00027282	0.000154318
unidentified	627.535	369	0.00029887	0.000233629	0.000351115	0.0003411
unidentified	627.535	374	0.000288456	0.000224003	0.000399876	0.000387433
unidentified	629.551	480	0.000330371	0.000202159	0.000410034	0.000259618
unidentified	631.567	507	0.000655006	0.000316572	0.00103384	0.0004864
unidentified	631.567	514	0.000636006	0.000316572	0.000739489	0.000376781
unidentified	633.581	529	0.000169429	8.65382e-05	0.000278079	0.000110516
unidentified	641.512	388	0.000129083	8.22717e-05	9.39219e-05	7.30764e-05
unidentified	643.529	398	0.000153072	0.000106315	0.000166911	0.000140851
unidentified	647.458	396	0.00272814	0.00177786	0.00139382	0.00134361
unidentified	663.454	375	0.00239461	0.0018338	0.00156821	0.00146266
unidentified	664.603	404	1.62722e-05	1.16031e-05	1.13268e-05	9.23247e-06
unidentified	666.631	416	0.000619339	0.000321277	0.000986977	0.000675984
unidentified	668.639	429	0.000285753	0.000125917	0.000249739	0.000155656
unidentified	669.557	402	4.06733e-05	3.13366e-05	3.09366e-05	2.94306e-05
unidentified	671.577	428	0.000185066	0.000123836	0.000112198	8.408e-05
unidentified	684.204	382	0.000235193	0.000121819	6.95123e-05	3.63069e-05
unidentified	685.435	374	0.00286856	0.00218703	0.00259356	0.00247663
unidentified	685.545	389	0.000275078	0.000161443	0.000344468	0.000233811
unidentified	687.558	418	5.02909e-05	2.51856e-05	5.08402e-05	2.10208e-05
unidentified	701.409	374	0.000209639	0.000156287	0.000117096	0.000102341
unidentified	704.526	366	0.00013278	6.92974e-05	0.000117047	6.79975e-05
unidentified	704.573	361	0.0111863	0.00916681	0.0115841	0.00966857
unidentified	705.586	362	0.000435287	0.000359446	0.000325887	0.00030123
unidentified	707.547	362	0.00225497	0.00140004	0.00237464	0.00193359
unidentified	708.509	374	0.00582044	0.00416973	0.00273946	0.00257244
unidentified	708.615	397	4.48199e-05	2.39313e-05	2.8191e-05	1.56811e-05
unidentified	714.543	377	0.000155685	0.000112355	0.000164906	0.000119125
unidentified	715.586	410	0.000375893	0.000187331	0.000418166	0.000217534
unidentified	717.58	377	0.000128006	0.000104912	0.000106665	9.67601e-05
unidentified	721.509	374	0.00856195	0.00656695	0.00609725	0.00595428
unidentified	726.552	360	0.00035162	0.000299538	0.000321234	0.000276804
unidentified	730.573	377	0.000147724	0.000107314	0.000120467	9.63858e-05
unidentified	736.647	404	0.000134795	6.16102e-05	8.96229e-05	4.77806e-05
unidentified	741.606	382	0.00276466	0.00202705	0.00176259	0.00144613
unidentified	743.617	397	0.00016234	0.000108787	0.000114285	9.34949e-05
unidentified	752.678	425	0.000168165	9.08915e-05	0.00012635	6.43768e-05
unidentified	769.632	410	0.000177428	0.000115754	0.000116887	7.80523e-05
unidentified	771.645	429	0.000763685	0.00047237	0.000406926	0.000261981
unidentified	773.658	436	0.000546317	0.000358423	0.000319949	0.000200506
unidentified	795.644	398	0.000189393	0.000130714	0.000139344	0.000129356
unidentified	797.661	429	0.00115898	0.000738787	0.000614903	0.000460877
unidentified	798.583	379	0.000154933	0.000115188	8.94421e-05	7.98699e-05
unidentified	799.675	440	0.00142198	0.00088486	0.000711407	0.00049097
unidentified	799.676	445	0.00144479	0.00088486	0.000722536	0.000513054
unidentified	801.692	459	0.00115169	0.000711101	0.000575905	0.000453703
unidentified	801.693	452	0.0011574	0.000724252	0.000606659	0.000470969
unidentified	803.709	442	0.00024289	0.000161288	0.000168571	0.000114473
unidentified	805.728	450	0.000223391	0.000132875	0.000199339	0.000139297
unidentified	818.662	395	0.000283838	0.000191245	0.000213949	0.000176414
unidentified	821.663	418	0.000136384	6.93384e-05	9.074e-05	5.26906e-05
unidentified	823.679	434	0.00144438	0.000853869	0.000724659	0.000480853
unidentified	825.696	451	0.00235633	0.00141724	0.00120335	0.000842369
unidentified	827.713	470	0.00326608	0.00206726	0.00159609	0.00118999
unidentified	827.782	496	0.010511	0.00767616	0.00605732	0.00587921
unidentified	828.552	358	0.000350453	0.000233638	0.000463801	0.000376959
unidentified	829.729	469	0.00185241	0.000778656	0.000683511	0.00038203
unidentified	829.752	494	0.00343961	0.00257811	0.00177468	0.001572
unidentified	831.745	469	0.000475391	0.000300485	0.000347338	0.000236629
unidentified	832.244	403	0.000240707	0.000111775	8.69019e-05	4.3912e-05
unidentified	835.669	406	0.000173845	0.000141133	0.000168801	0.000148193
unidentified	839.712	457	0.000794173	0.000478319	0.000422985	0.000316319
unidentified	840.648	416	7.66166e-05	5.21635e-05	6.16282e-05	5.71128e-05
unidentified	840.708	440	0.000510551	0.000304623	0.000262191	0.000195033
unidentified	841.725	473	0.0010471	0.000635522	0.00050236	0.000386219
unidentified	841.759	491	0.000759724	0.0004373	0.000327941	0.000211037
unidentified	843.683	465	0.000662701	0.000387381	0.000442211	0.000304879
unidentified	848.713	469	0.00131541	0.000516913	0.000820906	0.000263442
unidentified	849.697	449	0.00117553	0.000723874	0.000599449	0.000425301
unidentified	851.71	449	0.00258475	0.00158104	0.00127787	0.000919562
unidentified	855.743	492	0.004998	0.00325073	0.00264373	0.00176539
unidentified	855.746	470	0.00371452	0.00190096	0.00163291	0.00103376
unidentified	857.749	497	0.00149083	0.000909677	0.00107549	0.000618693
unidentified	857.754	510	0.00143048	0.000888178	0.000807566	0.000635275
unidentified	857.76	477	0.00134033	0.000849822	0.00108312	0.000693628
unidentified	858.783	481	0.000958907	0.000565646	0.000721403	0.000415032
unidentified	859.776	477	0.00106881	0.000590438	0.000905111	0.000584257
unidentified	865.725	458	0.000858657	0.000492131	0.000427879	0.000306313
unidentified	867.738	475	0.0017317	0.00101263	0.000823986	0.000673779
unidentified	869.699	469	0.000693936	0.000404482	0.000469982	0.000278511
unidentified	871.715	478	0.00104825	0.000585669	0.000754614	0.000396772
unidentified	871.771	542	0.00216175	0.00155844	0.00119751	0.00100832
unidentified	875.705	438	0.00131826	0.000735505	0.000656295	0.000502282
unidentified	877.721	448	0.00363901	0.00218535	0.00182432	0.00120212
unidentified	879.736	465	0.00919259	0.00543651	0.00403727	0.00268206
unidentified	881.754	488	0.0124792	0.00708542	0.0057567	0.00446975
unidentified	881.757	483	0.0125232	0.00723716	0.00454201	0.00264665
unidentified	882.759	479	0.00639659	0.003574	0.00278359	0.00164167
unidentified	882.76	487	0.00647468	0.00373577	0.00286414	0.00187782
unidentified	883.769	519	0.00511568	0.00302037	0.00232264	0.00169658
unidentified	883.775	501	0.00435946	0.00239664	0.00169823	0.0011602
unidentified	885.786	530	0.000974777	0.000640671	0.000665589	0.000449164
unidentified	885.793	495	0.000935805	0.000559462	0.000744214	0.000476084
unidentified	887.747	542	0.00077111	0.000522982	0.000477212	0.000368469
unidentified	887.794	455	0.00196742	0.000923788	0.00133592	0.00053029
unidentified	889.807	474	0.00644228	0.00298684	0.00411359	0.00167413
unidentified	891.823	498	0.00807784	0.002902	0.00473934	0.00171782
unidentified	892.835	512	0.00213475	0.00106571	0.00127631	0.000545655
unidentified	893.697	453	0.000737985	0.000487371	0.000481282	0.000338628
unidentified	893.76	470	0.000985843	0.000588436	0.000498712	0.000373755
unidentified	894.854	537	0.000431617	0.000293821	0.000186828	9.83189e-05
unidentified	895.714	459	0.000965163	0.000558744	0.000601084	0.000353336
unidentified	895.771	483	0.00142603	0.000852107	0.000707996	0.000514747
unidentified	897.731	473	0.0012397	0.000610538	0.00101524	0.00045461
unidentified	899.747	517	0.00133948	0.000695512	0.00074014	0.000485265
unidentified	901.725	439	0.00145953	0.000841384	0.000735021	0.000522158
unidentified	903.744	449	0.0030556	0.00179305	0.00154815	0.00106377
unidentified	905.761	463	0.00664348	0.00406572	0.00325715	0.00237598
unidentified	907.777	484	0.00917186	0.00603298	0.00468679	0.00331935
unidentified	907.851	540	0.00893755	0.00270145	0.00659975	0.0022942
unidentified	908.863	559	0.00201084	0.000859879	0.00107805	0.000441367
unidentified	909.792	514	0.00849173	0.00526955	0.00431238	0.00278777
unidentified	910.789	474	0.000502492	0.000293049	0.0015451	0.000943203
unidentified	910.81	507	0.00399878	0.00228298	0.00210382	0.00125016
unidentified	911.804	544	0.00243248	0.00145479	0.00117706	0.000685042
unidentified	913.804	450	0.00135141	0.000782094	0.000398833	0.000265169
unidentified	913.817	567	0.00044208	0.000256476	0.000189638	0.000120628
unidentified	915.82	468	0.00272689	0.00177279	0.000911482	0.000549566
unidentified	916.811	466	0.00164391	0.00100011	0.00059078	0.000374578
unidentified	917.835	491	0.00356851	0.00238858	0.00150508	0.00107835
unidentified	919.852	518	0.00221392	0.00128008	0.000869726	0.000498876
unidentified	920.859	522	0.0013032	0.000735871	0.000416066	0.000272505
unidentified	920.864	528	0.00129891	0.000728882	0.000406954	0.000269663
unidentified	921.725	460	0.00108032	0.000646712	0.000696666	0.000477891
unidentified	921.868	530	0.000480784	0.000276169	0.000158589	9.30708e-05
unidentified	923.746	474	0.00138688	0.000772234	0.00087636	0.000510541
unidentified	923.803	525	0.000380485	0.000252644	0.000185849	0.000124371
unidentified	925.732	447	0.000779303	0.000503864	0.000403701	0.000321024
unidentified	925.764	497	0.00160867	0.0010026	0.00123869	0.000659482
unidentified	927.746	442	0.00137379	0.000779122	0.000631371	0.000490734
unidentified	927.779	545	0.000890263	0.00046979	0.000418093	0.000305312
unidentified	927.825	468	0.00610104	0.00299288	0.00327723	0.0019767
unidentified	929.764	454	0.00204421	0.00108979	0.000890912	0.000775564
unidentified	931.786	472	0.000878522	0.000554302	0.000403246	0.000308348
unidentified	933.795	483	0.00151163	0.000886542	0.000657005	0.00053984
unidentified	934.884	567	0.00104886	0.000424549	0.000742783	0.000355788
unidentified	935.81	509	0.00305679	0.00175474	0.00146525	0.00102818
unidentified	937.804	436	0.000536718	0.000278932	0.000286185	0.000212609
unidentified	937.807	448	0.000521712	0.000299725	0.000354955	0.000280001
unidentified	937.825	546	0.00167731	0.000960168	0.000826853	0.000488118
unidentified	938.849	533	0.000923917	0.000554001	0.000511548	0.000302803
unidentified	939.821	448	0.00127995	0.000695844	0.000381112	0.000275852
unidentified	939.836	570	0.000427895	0.000243368	0.00020882	0.000123784
unidentified	941.834	463	0.00275454	0.0015137	0.000773695	0.000504556
unidentified	942.849	468	0.00177528	0.000935722	0.000495745	0.000299518
unidentified	943.85	484	0.00360132	0.00210211	0.00100335	0.00068678
unidentified	944.865	495	0.00241933	0.00144193	0.000704272	0.000475278
unidentified	945.726	452	0.0005332	0.000295452	0.000299665	0.000239084
unidentified	945.866	514	0.00294871	0.00174251	0.00084546	0.000565115
unidentified	946.878	521	0.00200737	0.00114692	0.000559777	0.000335567
unidentified	947.881	534	0.000880117	0.000531898	0.00030388	0.000181307
unidentified	951.747	432	0.000443466	0.000262853	0.000198757	0.000159355
unidentified	951.779	502	0.000843917	0.000538989	0.000523455	0.000398061
unidentified	953.768	443	0.000608585	0.000348642	0.00027418	0.000226755
unidentified	953.796	534	0.00060169	0.000375833	0.000337502	0.000205536
unidentified	961.808	428	0.000284414	0.000168049	8.05199e-05	5.49895e-05
unidentified	962.916	615	0.000170871	0.000101475	0.000148992	7.49016e-05
unidentified	963.82	441	0.000557838	0.000320193	0.000151665	9.4533e-05
unidentified	963.841	535	0.000627018	0.000348661	0.000299594	0.000178162
unidentified	965.835	447	0.000895721	0.000495527	0.000304463	0.000239775
unidentified	965.855	584	0.000369608	0.000217571	0.000191708	0.000117505
unidentified	967.852	469	0.000404816	0.000264982	0.000129497	9.42644e-05
unidentified	969.869	481	0.000690203	0.000406943	0.000199831	0.00011186
unidentified	970.792	428	0.000256994	0.000140447	0.000156568	0.000107369
unidentified	971.883	508	0.00135685	0.000802729	0.000404924	0.000233351
unidentified	972.896	515	0.000933444	0.000566524	0.000284467	0.000164586
unidentified	973.899	536	0.00058663	0.000334068	0.000191962	9.43173e-05
unidentified	975.913	555	0.000181078	0.000108094	6.04772e-05	3.48368e-05
unidentified	980.284	418	0.000590965	0.000268281	0.000168381	7.37368e-05
unidentified	982.888	505	0.000187415	0.000126397	0.000135349	8.86387e-05
unidentified	987.821	431	0.000188837	0.000117113	5.34975e-05	3.92588e-05
unidentified	991.873	575	0.000239777	0.000157516	0.000126634	8.08799e-05
unidentified	999.915	536	0.000245191	0.000141119	7.77363e-05	4.1762e-05
unidentified	1001.93	567	0.000115987	7.1991e-05	4.10192e-05	2.92653e-05
unidentified	1054.31	428	0.000554418	0.000269048	0.000147941	5.76058e-05
unidentified	1055.31	428	0.000577543	0.000286611	0.000155078	6.37697e-05
unidentified	1126.05	384	0.00071644	0.000514867	0.000430177	0.000380606
unidentified	1128.32	439	0.000499058	0.000237926	0.000127261	5.17154e-05
unidentified	1194.82	356	9.97565e-05	6.74687e-05	5.73007e-05	5.36044e-05
