# Supplementary material for: Novel Theranostic Opportunities Offered by Characterization of Altered Membrane Lipid Metabolism in Breast Cancer Progression
Source: Oxford University Press journal article supplement (doi:10.1158/0008-5472.can-10-3894), 2011-03-17
Supplement: 00085472can103894-sup-stab_5.xls [file 00085472can103894-sup-stab_5.xls]

## Sheet: ESI-
Supplementary Table S5. Negative ion mode (ESI-) results for all investigated lipids. Notations of lipid/lipid type indicate that the exact structure can be one of the alternatives.
			ER- vs. ER+			Grade 3 vs 1&2			Tumor vs. normal			PR- vs. PR+			HER2+ vs. HER2-
Lipid	m/z	RT(s)	p-value	q-value	Fold change	p-value	q-value	Fold change	p-value	q-value	Fold change	p-value	q-value	Fold change	p-value	q-value	Fold change
Cer(d18:1/16:0)	536.505	376	0.632006	0.155711	-1.06122	0.242474	0.0391794	1.10116	0.00105414	0.000107177	2.48571	0.178292	0.231958	-1.12407	0.493221	0.46177	1.14162
Cer(d18:1/17:0)	596.526	384	0.43335	0.114675	1.02102	0.192874	0.033391	1.02439	0.703443	0.0398639	1.20518	0.981538	0.490359	-1.05329	0.892109	0.584973	-1.05769
GlcCer(d18:0/24:0(2-OH))	826.679	398	5.37632e-06	2.19504e-05	-4.45731	0.179353	0.0313704	-1.36386	0.219455	0.0139197	1.25849	0.000226842	0.00801343	-2.39689	0.74691	0.547558	-1.7305
GlcCer(d18:0/24:0(2-OH))	872.681	398	7.90958e-06	2.28228e-05	-3.39564	0.202495	0.0347025	-1.42361	0.0258283	0.0019623	1.84667	0.000628451	0.00981134	-2.34963	0.623363	0.497113	-1.4322
GlcCer(t18:0/24:0)	828.689	407	0.0153537	0.00895514	-1.63077	0.835167	0.115199	1.0431	5.85437e-05	1.06514e-05	2.96104	0.0112792	0.0640326	-1.64809	0.350779	0.413007	1.3932
GlcCer(t18:0/24:0)	874.696	408	0.017821	0.00979453	-1.63416	0.71454	0.102047	1.32624	1.39908e-05	4.97385e-06	3.54369	0.00928367	0.0623538	-1.62	0.212601	0.302814	1.39552
PC(14:0/16:0)	750.536	362	3.19355e-08	9.127e-07	2.36434	3.19598e-08	5.42232e-07	1.94267	7.39127e-05	1.27753e-05	2.83055	0.0210901	0.0679328	1.53191	0.0847974	0.293644	1.25766
PC(16:0/16:0)	778.561	378	3.18034e-06	1.99261e-05	1.83977	2.4253e-06	4.57198e-06	1.53689	0.00340321	0.000290479	2.19841	0.143814	0.204115	1.28571	0.183309	0.293644	1.35379
PC(16:0/16:0)	778.574	393	0.104004	0.0404871	1.13874	0.14524	0.0264964	1.0884	0.000288266	3.76035e-05	2.34382	0.62154	0.408285	1.05188	0.488808	0.46177	1.05766
PC(16:0/16:1)	688.498	363	0.00134933	0.00132976	1.34146	0.00650306	0.00187003	1.20792	0.0297405	0.00223497	1.87431	0.0228754	0.0679328	1.30183	0.0081157	0.191517	1.42581
PC(16:0/18:1)	804.575	378	0.189959	0.065409	1.1162	0.000917483	0.000420705	1.26848	2.59956e-06	2.31573e-06	3.46382	0.886524	0.465223	1.0274	0.503604	0.46177	1.07639
PC(16:0/20:4)	826.561	361	7.98572e-06	2.28228e-05	1.68925	3.09683e-07	1.31353e-06	1.65641	0.000559245	6.13723e-05	2.05455	0.0480847	0.111214	1.35135	0.117703	0.293644	1.45291
PC(16:0/20:4)	826.562	355	0.104895	0.0404871	1.125	0.00357799	0.00114537	1.35342	0.0352022	0.00256187	1.50554	0.463677	0.380841	1.07828	0.128492	0.293644	1.35204
PC(18:0/20:3)	856.609	382	0.0250138	0.0132385	1.30899	0.000482615	0.000255878	1.40311	7.01957e-05	1.24439e-05	2.40605	0.686921	0.415224	1.0409	0.87181	0.584973	1.00735
PC(18:0/20:4)	854.593	376	0.000317968	0.000413063	1.31352	3.04937e-05	3.69542e-05	1.29437	0.000302227	3.86946e-05	2.10484	0.251212	0.299833	1.13	0.192718	0.293644	1.11373
PC(18:0/22:5)	880.608	375	0.0160792	0.00906284	1.23176	0.000165506	0.000110133	1.38889	0.000732884	7.91709e-05	2.35863	1	0.495618	-1.03448	0.527774	0.46751	1.18595
PC(18:0/22:6)	790.538	372	0.000101977	0.000194298	1.68718	2.01728e-06	4.52574e-06	1.72749	2.06226e-05	5.70315e-06	4.25358	0.0619437	0.128942	1.20588	0.256714	0.33248	1.17647
PC(18:0/22:6)	850.562	355	8.64632e-05	0.000184359	1.99216	6.01759e-07	1.70158e-06	1.75681	0.0338927	0.00251162	2.0493	0.0507635	0.113217	1.42912	0.0770715	0.293644	1.4911
PC(18:1/18:0)	832.608	392	0.993296	0.225301	1.0669	0.0825376	0.0170773	1.16886	4.24936e-06	2.57894e-06	4.06452	0.268339	0.304676	-1.09988	0.918046	0.589483	-1.05502
PC(18:1/20:1)	858.625	391	0.265609	0.0825105	-1.22034	0.139059	0.0259263	1.31075	0.000122781	1.97411e-05	3.22388	0.0692865	0.133368	-1.36079	0.200836	0.300127	-1.2451
PC(18:1/20:4)	852.578	361	0.000281584	0.000383216	1.59873	1.67259e-05	2.18287e-05	1.48495	0.000783532	8.20774e-05	2.24462	0.19237	0.245164	1.11294	0.496178	0.46177	-1.01949
PC(32:1)	776.546	363	6.24025e-06	2.22929e-05	2.09554	2.0961e-07	1.28194e-06	1.93939	2.52305e-06	2.31573e-06	5.09745	0.00283415	0.0252837	1.63208	0.0177267	0.191517	1.42331
PC(32:1)	776.565	383	0.00808084	0.00502058	1.32548	0.0571744	0.0122788	1.14488	0.00442917	0.000364547	1.94399	0.679841	0.415224	1.03559	0.17798	0.293644	1.18664
PC(34:2)	802.56	365	0.773529	0.182703	-1.11879	0.0950141	0.0191907	1.06546	0.000157364	2.31483e-05	1.87709	0.279325	0.306022	-1.11603	0.117702	0.293644	1.33803
PC(36:2)	830.592	380	0.240336	0.0780532	-1.17755	0.204805	0.0347473	1.10895	0.000182352	2.62652e-05	2.05591	0.052854	0.113814	-1.26379	0.826009	0.573105	1.08439
PC(36:3)	828.576	367	0.0473827	0.0221996	1.29397	0.00120249	0.000535258	1.30667	2.85899e-05	6.81593e-06	2.38041	0.640727	0.408285	1.08374	0.474235	0.46177	1.08955
PC(O-16:0/18:2)	788.582	375	0.291692	0.0870796	-1.15232	0.0559124	0.0121617	1.18367	0.00237156	0.000207548	2.3338	0.171554	0.22794	-1.12621	0.189549	0.293644	1.2716
PC(P-16:0/18:1)/PC(O-16:1/18:1)	728.56	400	0.365312	0.102357	-1.11641	0.39975	0.0605554	1.08339	1.43884e-05	4.97385e-06	3.58701	0.0231077	0.0679328	-1.17614	0.633319	0.497113	1.07403
PC(P-18:0/20:4)/PC(O-18:2/20:4)	838.598	370	0.028315	0.014197	1.24382	0.000548045	0.000281763	1.27207	0.00229979	0.000203847	1.76163	0.725608	0.415224	1.07426	0.411739	0.438296	1.06803
PE(18:0/18:1)	744.556	395	0.0111699	0.0067921	1.37943	9.29055e-06	1.43295e-05	1.44466	2.20265e-06	2.31573e-06	6.22544	0.454328	0.37829	1.06856	0.589057	0.497113	1.17333
PE(18:0/20:3)	768.548	386	0.00041094	0.000510628	1.78647	4.0203e-05	4.30314e-05	1.57955	1.64954e-06	2.31573e-06	3.75803	0.123367	0.1926	1.26258	0.725753	0.537115	1.17342
PE(18:0/20:4)	766.538	361	1.51209e-05	3.92861e-05	1.55339	5.16957e-07	1.70158e-06	1.61185	0.00394273	0.00032842	1.71014	0.0203481	0.0679328	1.36658	0.0445576	0.266346	1.3236
PE(18:0/20:4)	766.539	380	9.03105e-05	0.000184359	1.51159	9.05921e-05	7.31902e-05	1.3289	4.70957e-06	2.57894e-06	4.43709	0.0417101	0.107121	1.19811	0.392049	0.429091	-1.01515
PE(18:0/22:4)	794.564	388	0.00498062	0.00384712	1.37852	0.00138591	0.000573499	1.31099	1.84736e-05	5.70315e-06	2.9919	0.546118	0.408285	1.05951	0.89211	0.584973	-1.15469
PE(18:1/18:0)	744.554	378	0.00310158	0.00260711	1.34511	0.000211522	0.000126977	1.36047	3.40552e-05	7.35904e-06	3.81853	0.32726	0.319323	1.11386	0.0847932	0.293644	1.29016
PE(34:1)	716.525	382	0.000677363	0.000716989	1.53731	4.31174e-05	4.30314e-05	1.50607	2.5995e-06	2.31573e-06	4.42771	0.012998	0.0656132	1.33209	0.0252203	0.191517	1.42254
PE(36:2)	742.539	365	0.755901	0.180027	-1.00895	0.131406	0.02505	1.00769	0.0055158	0.000448643	1.81755	0.446225	0.37829	-1.04737	0.029817	0.193086	1.25614
PE(36:2)	742.539	383	0.838554	0.196438	1.06098	0.0183352	0.00457466	1.25696	1.89234e-06	2.31573e-06	4.39974	0.578634	0.408285	-1.08689	0.121594	0.293644	1.11526
PE(36:3)	740.523	369	0.564936	0.144157	1.02	0.0452023	0.00995982	1.19035	4.44456e-05	8.77954e-06	4.1129	0.862214	0.464167	1.015	0.0143468	0.191517	1.57113
PE(36:4)	738.51	364	4.18329e-06	1.99261e-05	1.84486	0.000152062	0.000107496	1.43991	4.24945e-06	2.57894e-06	4.3622	0.0193281	0.0679328	1.21006	0.239482	0.320858	1.20907
PE(P-16.0/16:1)/PE(O-16:1/16:1)	672.498	373	0.396115	0.1068	1.25	0.000599877	0.00028271	1.75489	0.000146139	2.19644e-05	2.65325	0.38446	0.358339	1.31912	0.087798	0.293644	1.50873
PE(P-16:0/18:1)	700.529	387	0.195706	0.0665854	-1.18584	0.212448	0.0353374	1.11158	2.67892e-06	2.31573e-06	5.07677	0.0655288	0.132004	-1.24829	0.786181	0.560485	-1.06897
PE(P-16:0/18:2)	698.514	375	0.000245064	0.00036483	-1.84401	0.715756	0.102047	-1.15222	4.16044e-05	8.46001e-06	2.48055	0.00174937	0.0182074	-1.54913	0.873653	0.584973	-1.14831
PE(P-16:0/18:2)/PE(O-16:1/18:2)	698.556	364	0.126229	0.0474681	-1.38215	0.311949	0.0492501	1.11027	0.00386647	0.000325996	2.10646	0.443924	0.37829	-1.17505	0.628328	0.497113	-1.07364
PE(P-16:0/20:4)	722.513	371	0.000152419	0.000256239	1.64553	1.26311e-05	1.78583e-05	1.4259	0.000140801	2.16323e-05	3.20564	0.369877	0.34997	1.09203	0.48734	0.46177	1
PE(P-36:2)	726.545	388	0.00581712	0.00429082	-1.60228	0.874704	0.118722	-1.04954	3.01794e-05	6.95505e-06	3.18464	0.00159496	0.0182074	-1.5668	0.405111	0.43723	-1.25324
PE(P-38:4)	750.545	384	0.000567193	0.000643088	1.70217	0.000599844	0.00028271	1.57522	0.00799086	0.0006424	1.52381	0.631105	0.408285	1.15612	0.530836	0.46751	1.25391
PI(18:0/20:3)	887.566	371	0.00585531	0.00429082	1.36067	4.59328e-05	4.32944e-05	1.6318	2.67958e-06	2.31573e-06	3.36531	0.0704769	0.133368	1.2467	0.137552	0.293644	1.32251
PI(18:0/20:4)	885.551	365	0.000146074	0.000256239	1.62376	0.000211538	0.000126977	1.37931	0.000766231	8.14998e-05	1.73344	0.105674	0.175725	1.25714	0.172026	0.293644	1.32075
SM(d18:1/16:0)	687.545	359	0.106249	0.0404871	1.23554	0.0426423	0.00951939	1.19828	0.000278017	3.76035e-05	1.84366	0.894143	0.465311	1.052	0.00599828	0.191517	1.35537
SM(d18:1/16:0)	747.559	359	0.175486	0.0634848	1.15281	0.010704	0.00286396	1.22418	3.7906e-05	7.94153e-06	2.095	0.725612	0.415224	1.08454	0.0259951	0.191517	1.24878
SM(d18:1/20:0)	803.63	393	0.260228	0.0825105	1.18699	0.622317	0.0918113	1.0998	0.730966	0.0410869	-1.00385	0.442777	0.37829	-1.02308	0.436131	0.445935	1.25
SM(d18:1/22:0)	831.661	406	0.0200609	0.0108176	1.37887	0.0031393	0.00102426	1.39569	0.00147026	0.000137364	1.74365	0.586571	0.408285	1.01671	0.144495	0.293644	1.2824
SM(d18:1/24:0)	859.692	419	0.000255309	0.00036483	1.65152	5.93777e-05	5.30215e-05	1.55	2.39722e-05	5.91917e-06	2.66794	0.485127	0.386345	1.17836	0.214324	0.302814	1.15774
SM(d18:1/24:1)	857.677	404	0.0880786	0.0357738	1.17448	0.00911888	0.00257853	1.2345	0.000191405	2.70065e-05	1.84689	0.606622	0.408285	-1.10986	0.780787	0.560485	-1.04233
SM(d18:1/24:1)	857.679	409	0.0377697	0.0182956	1.3929	0.0153589	0.0039482	1.32856	0.0637015	0.00440413	1.62726	0.631105	0.408285	-1.01872	0.32142	0.396461	1.0565
SM(d18:1/24:2)	855.66	392	0.00454375	0.00371024	1.43576	0.0133533	0.00348544	1.18044	0.0949053	0.0063091	1.50118	0.15413	0.213891	1.115	0.106614	0.293644	1.25902
unidentified	255.233	266	0.0564925	0.0259995	1.2072	0.0012304	0.000535258	1.20526	0.261179	0.0161224	1.3828	0.488749	0.386345	1.04268	0.560367	0.483835	1.3317
unidentified	281.249	271	0.302389	0.0881849	1.35663	0.00189275	0.000746804	1.5977	0.205932	0.0133061	1.34653	0.728506	0.415224	-1.02123	0.152376	0.293644	-1.31148
unidentified	283.265	300	0.0450879	0.0214765	1.46023	0.00230342	0.000794345	1.19883	0.181734	0.0118533	1.30403	0.306754	0.319323	1.11096	0.895808	0.584973	1.10112
unidentified	303.233	240	0.000485085	0.000577645	1.71244	0.000456874	0.000250044	1.64755	3.40612e-05	7.35904e-06	3.95664	0.104024	0.175725	1.30607	0.6996	0.522738	1.07469
unidentified	383.19	300	0.0711826	0.0303651	1.2668	0.041333	0.00942437	1.31165	0.960824	0.052721	-1.02941	0.721273	0.415224	1.01961	0.175727	0.293644	1.2337
unidentified	398.233	254	0.278431	0.0846534	1.29238	0.107518	0.0214607	1.22335	0.749502	0.0415843	1.09556	0.721271	0.415224	1.08354	0.996268	0.616733	1.17936
unidentified	409.311	311	0.390296	0.106233	1.10458	0.21067	0.0353374	1.17153	0.576344	0.0334846	1.20159	0.781251	0.431747	1.01185	0.646699	0.500151	1.0543
unidentified	465.305	279	0.294583	0.0870796	-1.17949	0.849155	0.116184	1.0037	0.388325	0.0231445	1.375	0.143817	0.204115	-1.07239	0.615116	0.497113	1.19845
unidentified	582.511	376	0.416289	0.11119	-1.12881	0.288447	0.0461681	1.08969	0.00118732	0.00011685	1.95652	0.450845	0.37829	-1.04677	0.5051	0.46177	1.08482
unidentified	586.497	384	0.206053	0.069281	1.02273	0.137322	0.0258868	1.05882	0.383271	0.0230419	-1.09143	0.842553	0.457527	1.00559	0.115519	0.293644	1.27219
unidentified	646.615	411	0.53136	0.136811	1.12563	0.0729638	0.0152828	1.31646	0.00133608	0.000128296	1.78059	0.276765	0.306022	-1.12755	0.650062	0.500151	-1.01914
unidentified	682.593	411	0.277505	0.0846534	1.15041	0.0108035	0.00286396	1.64055	7.68088e-05	1.2952e-05	2.44819	0.514527	0.401638	-1.2529	0.868127	0.584973	-1.07377
unidentified	692.62	411	0.624555	0.155213	-1.05096	0.120163	0.0234332	1.27184	0.0015831	0.000144014	2.12903	0.252013	0.299833	-1.19171	0.388181	0.429091	-1.12081
unidentified	714.509	368	0.345632	0.0978018	-1.03797	0.0416612	0.00942437	1.12447	5.61323e-06	2.62526e-06	3.03226	0.904832	0.466981	-1.10239	0.000230341	0.0178994	1.53425
unidentified	714.547	362	0.713188	0.171658	-1.17853	0.801064	0.111401	1.02927	0.751845	0.0415843	-1.03171	0.469588	0.380841	-1.27273	0.175732	0.293644	1.43719
unidentified	719.535	338	0.00161708	0.00154051	1.43976	0.00215802	0.000771198	1.33333	0.0341485	0.00251162	1.34118	0.117829	0.18867	1.21176	0.016528	0.191517	1.46386
unidentified	730.551	388	0.0261225	0.0133316	1.3801	0.00143336	0.000579012	1.427	4.81057e-05	9.23856e-06	2.55083	0.0893322	0.159389	1.34278	0.0271101	0.191517	1.62121
unidentified	736.53	376	0.0066943	0.0044493	1.42	0.143898	0.0264964	1.18447	0.00931525	0.000740263	1.7092	0.10693	0.175725	1.30824	0.157122	0.293644	1.23944
unidentified	748.53	371	0.00652552	0.00444117	1.33929	0.0041354	0.00129929	1.25714	0.00088475	9.1297e-05	2.0413	0.624258	0.408285	1.04261	0.784381	0.560485	1.07514
unidentified	762.514	358	1.77222e-07	2.53246e-06	1.83449	2.26676e-07	1.28194e-06	1.5249	0.000284823	3.76035e-05	3.27885	0.00568623	0.0443866	1.20717	0.0762904	0.293644	1.41463
unidentified	762.563	373	0.213694	0.0710146	1.11513	0.0292601	0.00709186	1.23466	0.0427456	0.0030467	1.56701	0.434798	0.37829	1.16118	0.0197253	0.191517	1.77241
unidentified	762.564	383	0.00636214	0.00444117	1.52597	0.00255143	0.000848781	1.43602	0.0512419	0.0035785	1.32222	0.744497	0.418849	1.07054	0.535443	0.46751	1.21429
unidentified	764.529	366	3.74254e-06	1.99261e-05	1.88652	0.000168775	0.000110133	1.57695	1.92523e-05	5.70315e-06	3.84689	0.0138689	0.0656132	1.34941	0.330637	0.401457	1.03608
unidentified	764.577	386	0.034239	0.0168713	1.4359	0.00196703	0.000758472	1.40854	0.000332223	4.17616e-05	2.62898	0.622902	0.408285	1.20056	0.0882335	0.293644	1.3711
unidentified	768.555	367	0.0604067	0.0269749	1.36242	0.00234098	0.000794345	1.37956	0.000434491	5.15104e-05	1.70889	0.816996	0.447541	-1.0462	0.256712	0.33248	1.09603
unidentified	770.571	380	0.477737	0.125261	-1.29332	0.0878427	0.017956	1.19578	0.0106432	0.000836181	1.56936	0.132049	0.201126	-1.30981	0.30903	0.387326	1.22034
unidentified	770.572	394	0.185044	0.0644933	1.14576	0.00612899	0.00179289	1.30261	0.0014394	0.000136323	2.02166	0.58392	0.408285	-1.01645	0.958969	0.603302	1
unidentified	772.528	365	0.00754487	0.00479192	1.69598	0.00059267	0.00028271	1.73913	0.0162253	0.00126041	1.55224	0.405891	0.370316	1.23171	0.62999	0.497113	1.38942
unidentified	773.54	360	0.375405	0.104164	1.03571	0.00204355	0.000770468	1.39503	0.000540395	6.02602e-05	1.62126	0.636598	0.408285	-1.07097	0.484408	0.46177	1.06751
unidentified	774.55	378	0.00754514	0.00479192	1.49877	0.00218185	0.000771198	1.4987	0.259879	0.0161224	1.46777	0.582597	0.408285	1.25587	0.375452	0.425671	1.43765
unidentified	775.586	378	0.151999	0.0556932	1.125	0.151631	0.027368	1.16883	0.497479	0.0291476	-1.11008	0.317837	0.319323	-1.10173	0.360524	0.418145	1.147
unidentified	776.501	396	0.0831158	0.0344262	1.16304	0.11671	0.0230245	1.21387	0.341249	0.0208787	-1.19565	0.689758	0.415224	1.01276	0.106104	0.293644	1.32609
unidentified	786.528	395	0.247989	0.0796339	1.09496	0.235988	0.038498	1.08899	0.355456	0.0215572	-1.12857	0.548684	0.408285	1.09821	0.230268	0.313925	1.13083
unidentified	786.582	376	0.958122	0.220828	-1.08497	0.768577	0.107766	1.03266	0.101138	0.00665941	-1.17656	0.310423	0.319323	-1.22998	0.452851	0.457017	1.16981
unidentified	788.53	358	3.97706e-06	1.99261e-05	1.82766	2.13401e-06	4.52574e-06	1.53125	0.000352322	4.34972e-05	3.49081	0.0447003	0.107363	1.16529	0.18641	0.293644	1.08679
unidentified	788.586	384	0.330799	0.0954956	-1.11067	0.902961	0.121585	1.05085	0.656214	0.0374948	1.21678	0.0179743	0.0679328	-1.4878	0.159883	0.293644	-1.20175
unidentified	790.597	386	0.969841	0.221741	1.11017	0.0385081	0.00907412	1.31423	0.000198602	2.74615e-05	2.07828	0.409171	0.370316	-1.06286	0.136318	0.293644	1.38447
unidentified	792.546	365	0.00485152	0.00384712	1.4717	0.00021704	0.000126977	1.38259	0.00203313	0.000182552	1.55072	0.927782	0.47104	-1.09615	0.0996926	0.293644	1.25359
unidentified	792.566	382	0.00109824	0.00112097	1.5245	0.000106432	7.85101e-05	1.47292	5.69578e-06	2.62526e-06	3.61832	0.17035	0.22794	1.35543	0.345975	0.413007	1.22944
unidentified	794.561	377	0.00168852	0.00155668	1.6976	8.58372e-05	7.28161e-05	1.38286	0.000434522	5.15104e-05	1.80187	0.538449	0.408285	-1.06424	0.103605	0.293644	1.2547
unidentified	796.57	392	0.0573127	0.0259995	1.34348	0.00956257	0.00265966	1.33643	0.497475	0.0291476	-1.27609	0.705454	0.415224	-1.09009	0.185628	0.293644	1.06987
unidentified	797.654	404	0.0255634	0.0132834	1.39273	0.020708	0.00509179	1.25091	0.00287356	0.000248336	1.73864	0.920124	0.470982	-1.13121	0.08999	0.293644	1.22222
unidentified	798.641	403	0.379949	0.104411	1.11407	0.313508	0.0492501	1.12959	0.00158305	0.000144014	1.65944	0.251215	0.299833	-1.20661	0.628328	0.497113	1.10943
unidentified	800.661	399	0.000235178	0.00036483	-2.95222	0.373889	0.0576676	1.02405	0.00116211	0.000116442	2.54833	0.000373831	0.00801343	-1.85974	0.584229	0.497113	-1.11024
unidentified	810.527	383	0.714753	0.171658	1.02266	0.0166405	0.0042138	1.16012	3.61088e-06	2.57894e-06	2.82213	0.625628	0.408285	-1.04539	0.0794446	0.293644	1.27221
unidentified	810.563	367	0.00238734	0.00206755	1.49858	0.00035274	0.000199487	1.3672	0.0225487	0.00173217	1.34775	0.6532	0.41203	1.10359	0.600393	0.497113	1.13279
unidentified	810.682	413	0.147254	0.054655	1.27536	0.00435378	0.00134303	1.46939	2.3648e-05	5.91917e-06	3.44009	0.632479	0.408285	1.10507	1	0.616733	1.07407
unidentified	812.544	395	0.0137462	0.00818459	1.31413	4.22295e-05	4.30314e-05	1.63071	6.77722e-06	2.79749e-06	3.01356	0.364751	0.34997	1.09643	0.678932	0.517242	1.07092
unidentified	812.583	370	0.00652668	0.00444117	1.58893	0.000102235	7.85101e-05	1.73913	0.000510473	5.78567e-05	2.12881	0.259272	0.299833	1.32943	0.0181804	0.191517	1.64784
unidentified	815.555	359	0.265608	0.0825105	1.06374	0.00612915	0.00179289	1.26935	2.14889e-05	5.71415e-06	1.90296	0.885003	0.465223	1.05099	0.101148	0.293644	1.20173
unidentified	816.558	372	0.295552	0.0870796	1.03406	0.0385084	0.00907412	1.10487	0.000439579	5.15104e-05	2.10496	0.775336	0.431747	1.02044	0.908772	0.588493	1.02493
unidentified	822.581	391	0.579216	0.146493	-1.00713	0.041009	0.00942437	1.33684	2.06123e-05	5.70315e-06	2.49844	0.287978	0.310062	-1.12565	0.68923	0.51999	1
unidentified	834.53	380	0.000585045	0.000643088	1.44978	0.00134717	0.000571404	1.30377	0.000455017	5.24309e-05	1.96838	0.0428843	0.107121	1.24468	0.146434	0.293644	1.15638
unidentified	835.535	366	0.954774	0.220828	1.00505	0.17935	0.0313704	1.26975	7.28334e-06	2.79749e-06	2.96984	0.322528	0.319323	-1.30189	0.275817	0.351365	1.09524
unidentified	842.671	395	0.0161726	0.00906284	-1.85822	0.00993118	0.00271763	-1.65922	0.257293	0.0161224	-1.43458	0.0307887	0.0835952	-1.38826	0.430648	0.445935	-1.15779
unidentified	844.6	383	0.688278	0.168125	1.08387	0.420993	0.0632089	1.1082	0.00119998	0.00011685	2.00388	0.256018	0.299833	-1.06529	0.862608	0.584973	-1.18321
unidentified	845.677	412	0.071186	0.0303651	1.13636	0.539969	0.080361	1.05545	0.000133964	2.10497e-05	1.96416	0.667171	0.415224	1.05072	0.109694	0.293644	1.26538
unidentified	846.672	413	0.081631	0.0343084	1.23361	0.00212296	0.000771198	1.34498	1.92474e-05	5.70315e-06	2.83491	0.97231	0.489666	1.10728	0.210884	0.302814	1.12
unidentified	852.587	377	0.600966	0.150661	1.03333	0.651325	0.0952624	-1.09328	0.0427456	0.0030467	-1.56738	0.731406	0.415224	1.02721	0.962696	0.603302	1.06849
unidentified	861.551	368	0.0888727	0.0357738	-1.54124	0.762371	0.107766	1.11024	7.07559e-06	2.79749e-06	3.28076	0.0779729	0.143213	-1.45865	0.180245	0.293644	1.43529
unidentified	862.653	399	2.31217e-05	5.50672e-05	-2.52033	0.158235	0.0282592	-1.33465	0.0806706	0.00546797	1.58603	0.000384966	0.00801343	-2.02779	0.809657	0.569358	-1.29268
unidentified	863.566	382	0.0974674	0.0386885	-1.44081	0.691624	0.100292	1.12195	5.07016e-05	9.47394e-06	3.58442	0.00998495	0.0623538	-1.65123	0.925473	0.589483	1.02602
unidentified	872.565	378	0.1809	0.0644933	1.03386	0.0054664	0.00165613	1.23522	0.000112455	1.85114e-05	3.01767	0.886526	0.465223	-1.04583	0.226653	0.313925	1.27014
unidentified	874.581	392	0.0645441	0.0283791	1.24869	0.0620102	0.0131509	1.15903	0.591096	0.0340555	-1.08421	0.626996	0.408285	-1.02674	0.813282	0.569358	1.01053
unidentified	878.594	370	0.00191975	0.00171455	1.54645	5.07875e-06	8.61665e-06	1.50154	0.0501535	0.00353823	1.39927	0.316902	0.319323	1.12304	0.425192	0.445935	1.10695
unidentified	900.596	392	0.506855	0.131688	-1.14217	0.126894	0.0244648	1.21678	4.84925e-06	2.57894e-06	3.34072	0.136559	0.203043	-1.18227	0.527773	0.46751	1.16518
unidentified	903.769	488	0.18296	0.0644933	-2.03867	0.345751	0.0538169	-1.45364	0.0650294	0.00445143	-3.06471	0.0147096	0.0656132	-2.88849	0.0536929	0.293644	-2.79268
unidentified	927.768	464	0.33815	0.0966417	-1.52987	0.225854	0.0372026	-1.22769	0.208137	0.0133241	-2.04848	0.0239323	0.0679328	-2.02771	0.377969	0.425671	-1.50644
unidentified	929.784	486	0.235322	0.0773034	-1.87625	0.380915	0.058222	-1.80481	0.0867042	0.00581987	-2.53183	0.0213055	0.0679328	-2.87683	0.16268	0.293644	-2.24034
