# Supplementary material for: Novel Theranostic Opportunities Offered by Characterization of Altered Membrane Lipid Metabolism in Breast Cancer Progression
Source: Oxford University Press journal article supplement (doi:10.1158/0008-5472.can-10-3894), 2011-03-17
Supplement: 00085472can103894-sup-stab_6.xls [file 00085472can103894-sup-stab_6.xls]

## Sheet: Sheet1
Supplementary Table S6. Results normalized with total phospholipid concentration.
ESI-			ER- vs. ER+		Grade 3 vs. 1&2
Lipid	m/z	RT(s)	q-value	Fold change	q-value	Fold change
PC(14:0/16:0)	750.536	362	1.13096e-07	1.9027	0.000387087	1.30647
PC(16:0/16:0)	778.561	378	7.8917e-06	1.36126	0.0629459	1.10178
PC(32:1)	776.546	363	9.9035e-06	1.85359	0.000416301	1.52361
PE(36:4)	738.51	364	9.9035e-06	1.27562	0.100897	1.07865
PE(18:0/20:4)	766.538	361	3.30693e-05	1.32466	0.0363982	1.13924
PC(16:0/20:4)	826.561	361	6.52507e-05	1.25855	0.0292803	1.13625
PC(18:0/22:6)	790.538	372	0.00014539	1.33896	0.00211346	1.21106
PC(18:1/20:4)	852.578	361	0.000592226	1.15435	0.136516	1.04827
PE(P-16:0/20:4)	722.513	371	0.000767507	1.25305	0.0517104	1.08928
PE(18:0/20:4)	766.539	380	0.00089936	1.18512	0.233896	1.06197
PE(18:0/20:3)	768.548	386	0.0012292	1.3151	0.0687095	1.09568
PC(18:0/22:6)	850.562	355	0.00132754	1.33772	0.00611351	1.14613
PI(18:0/20:4)	885.551	365	0.0016824	1.30689	0.259158	1.01256
PE(34:1)	716.525	382	0.00253012	1.20182	0.0541833	1.14525
PC(18:0/20:4)	854.593	376	0.00914266	1.12476	0.240414	-1.01614
PC(16:0/16:1)	688.498	363	0.010997	1.23335	0.176003	-1.00667
PE(18:1/18:0)	744.554	378	0.0142929	1.08405	0.149688	1.04082
PE(P-38:4)	750.545	384	0.0207375	1.11628	0.305197	1.02381
PI(18:0/20:3)	887.566	371	0.0313869	1.13764	0.0789695	1.07361
PE(18:0/18:1)	744.556	395	0.0457782	1.1633	0.00376093	1.18236
PE(18:0/22:4)	794.564	388	0.0525799	1.07981	0.241539	-1.03022
PC(18:0/22:5)	880.608	375	0.0913229	1.08524	0.275717	1.01733
PC(32:1)	776.565	383	0.0919236	1.03737	0.0185271	-1.11346
PC(P-18:0/20:4)/PC(O-18:2/20:4)	838.598	370	0.112934	1.05943	0.240414	1.04723
PC(18:0/20:3)	856.609	382	0.119838	1.05098	0.176003	1.0613
PC(16:0/20:4)	826.562	355	0.124378	1.06224	0.273467	1.08256
PC(36:3)	828.576	367	0.177644	1.04486	0.267203	1.03761
PE(P-16.0/16:1)/PE(O-16:1/16:1)	672.498	373	0.139151	-1.00708	0.0789695	1.20865
PC(16:0/16:0)	778.574	393	0.108471	-1.04798	0.00367913	-1.11959
PE(36:3)	740.523	369	0.0919236	-1.20131	0.240414	-1.06118
PC(16:0/18:1)	804.575	378	0.0471727	-1.03224	0.275717	1.01036
PE(36:2)	742.539	365	0.010997	-1.13163	0.00711452	-1.10634
PE(36:2)	742.539	383	0.0108289	-1.22145	0.125646	-1.08736
PC(O-16:0/18:2)	788.582	375	0.00415302	-1.40782	0.29143	1.00364
PC(34:2)	802.56	365	0.0016824	-1.23851	0.00844459	-1.1366
PE(P-16:0/18:2)/PE(O-16:1/18:2)	698.556	364	0.000634298	-1.55694	0.0803817	-1.13499
PC(18:1/20:1)	858.625	391	0.000193647	-1.37771	0.0391033	-1.16675
PC(P-16:0/18:1)/PC(O-16:1/18:1)	728.56	400	0.000193647	-1.54729	0.00599344	-1.23337
PC(18:1/18:0)	832.608	392	0.000103102	-1.25629	0.00473042	-1.14196
PE(P-16:0/18:1)	700.529	387	1.16042e-05	-1.56966	0.0102413	-1.25782
PE(P-16:0/18:2)	698.514	375	2.7535e-06	-1.90626	0.0102413	-1.39682
PC(36:2)	830.592	380	1.00233e-06	-1.42369	0.000653029	-1.27969
PE(P-36:2)	726.545	388	6.06246e-07	-1.78384	0.00211346	-1.41455
ESI+
PC(30:0)	706.55	362	5.61307e-05	1.77707	0.000210271	1.55115
PC(32:1)	732.553	364	0.000585829	1.97631	0.000185423	1.72718
PC(34:4)+PE(37:4)	754.533	365	0.00259628	1.63897	0.00159759	1.63292
PC(32:1e)+PE(35:1e)	718.561	384	0.0026639	1.2422	0.00827361	1.19784
PC(32:0)	734.569	378	0.0078735	1.33106	0.35583	1.03592
PE(38:3)+PC(35:3)	770.578	383	0.0200853	1.21517	0.0322454	1.19174
PC(36:4)	804.551	361	0.0212895	1.29901	0.12649	1.20481
PC(36:4)	782.568	361	0.0238546	1.29161	0.0467557	1.23687
PC(31:2)+PE(34:2)	716.538	373	0.051117	1.29952	0.12649	1.18158
PC(37:4)+PE(40:4)	796.57	378	0.0585109	1.27734	0.377368	1.05208
PC(38:6)	806.57	357	0.0778378	1.22726	0.124695	1.09617
PC(36:5e)+PE(38:5e)	766.566	367	0.0784082	1.18732	0.275257	1.06431
PC(32:2)	730.538	352	0.0919524	1.39837	0.014733	1.49622
PE(38:4)	768.556	378	0.103542	1.21677	0.556019	-1.01938
PC(40:6)	834.602	373	0.112944	1.24161	0.0211817	1.18314
PE(40:6)+PC(37:6)	792.587	369	0.191809	1.16686	0.0689405	1.22457
PC(33:0)	748.591	386	0.195402	1.47008	0.124695	1.49463
PC(37:4)+PE(40:4)	796.604	390	0.226596	1.17551	0.173967	1.1117
PC(38:5)	830.571	367	0.341939	1.07608	0.356893	1.05661
PE(P-38:4)	752.554	382	0.350977	1.2721	0.54715	-1.04183
PC(34:3)	756.553	370	0.350977	1.31724	0.253782	-1.17401
PE(38:4)	768.578	373	0.350977	1.10786	0.24325	1.06315
PE(P-16:0/20:4)	724.525	369	0.364196	1.10756	0.15895	1.11084
PC(38:4)	810.6	382	0.364196	1.9384	0.56949	1.34167
PE(P-16:0/22:6)	748.528	365	0.379152	1.17409	0.253782	1.14103
PC(38:5)	808.585	369	0.379152	1.07297	0.263298	1.09237
PC(40:7)	832.586	376	0.379152	1.04741	0.514856	1.02973
PC(34:3e)+PE(37:3e)	742.546	379	0.382947	1.01791	0.542317	-1.02399
PC(33:4)	740.555	374	0.391781	1.07071	0.480471	1.12678
PC(38:4)	810.601	376	0.391781	1.00095	0.253782	1.08374
PC(38:3)	812.677	400	0.414567	1.23998	0.462292	1.02199
PC(38:3)	812.616	384	0.430396	1.00622	0.253782	1.19779
PC(35:1)	774.599	385	0.487533	1.04634	0.467249	1.20033
PE(P-18:0/22:5)	778.553	375	0.492117	1.10956	0.24048	-1.14472
PC(40:4)	838.633	392	0.431549	-1.0241	0.246227	1.11527
PE(17:0/17:0)	720.555	390	0.427864	-1.25783	0.253782	-1.33926
PC(38:6)	806.568	364	0.426472	-1.01534	0.542317	1.04472
PC(40:5)	836.617	378	0.421485	-1.02951	0.253782	1.05906
PE(P-38:5)	750.541	370	0.407234	-1.0277	0.490469	1.00959
PC(38:5e)	794.598	373	0.399091	-1.02859	0.397966	1.05931
PC(35:2)	772.582	374	0.391781	-1.06241	0.491356	1.02041
PC(34:1e)+PE(37:1e)	746.568	379	0.379152	-1.03358	0.40534	1.03856
PC(36:4)	782.566	377	0.379152	-1.13153	0.0392451	-1.32092
PC(38:2)	814.691	408	0.379152	-1.22293	0.547361	1.02102
PC(17:0/17:0)	762.659	405	0.379152	-1.44142	0.0743499	-1.59625
PC(36:1)	788.677	406	0.379152	-1.19042	0.361912	1.00433
PC(36:5)	780.553	359	0.379152	-1.66753	0.124695	-1.51788
PC(34:1e)+PE(37:1e)	746.576	392	0.379152	-1.13684	0.253782	1.01185
PC(35:1)	774.635	403	0.379152	-1.46216	0.31566	-1.1281
PC(34:2)	758.223	394	0.350977	-1.18984	0.000979503	-1.52641
PC(36:3)	784.584	368	0.350977	-1.06067	0.480772	1.06508
PC(34:4e)	740.605	377	0.197473	-1.27603	0.109858	-1.2575
PE(P-38:5)	750.408	396	0.195402	-1.30831	0.0322454	-1.41282
PC(33:2)+PE(36:2)	744.565	383	0.123081	-1.16675	0.465238	-1.03074
PC(37:2)	800.614	389	0.0574803	-1.44098	0.253782	-1.13677
PC(34:1)	760.585	378	0.0394	-1.09794	0.253782	-1.06954
PC(37:1)	802.637	404	0.0078735	-1.62071	0.253782	-1.23254
PC(38:1)	816.652	410	0.00384522	-1.25888	0.491356	-1.02715
PC(36:5)	780.551	365	0.00384522	-1.3862	0.0743499	-1.13165
PC(16:0/0:0)	496.341	196	0.00206809	-1.29334	0.124695	-1.14181
PC(34:2)	758.569	365	0.00206809	-1.34686	0.249253	-1.16255
PE(P-36:2)	728.56	382	0.000285336	-1.46923	0.124695	-1.2583
PC(38:5)	808.583	379	0.000100875	-1.48589	0.000436752	-1.35048
PE(P-16:0/18:1)	702.545	384	0.000100875	-1.72084	0.253782	-1.1271
PC(36:1)	788.617	391	6.41103e-05	-1.41073	0.253782	-1.11556
PC(38:2)	814.634	394	3.79177e-05	-1.63945	0.30458	-1.14668
PC(36:2)	786.601	380	7.62454e-07	-1.54298	0.00827361	-1.17214
